# Supplementary material for: Quantitative SERS detection of multiple breast cancer miRNAs based on duplex specific nuclease-mediated signal amplification
Source: Royal Society of Chemistry journal article supplement (doi:10.1039/d3ay00583f), 2023-01-01
Supplement: d3ay00583f1.pdf [file d3ay00583f1.pdf]

## Electronic Supplementary Information

### Quantitative SERS detection of multiple breast cancer miRNAs based on duplex specific nuclease-mediated signal amplification

Wei Xu<sup>a</sup>, Yu Zhang<sup>b</sup>, Dianhai Hou<sup>a</sup>, Jianjun Shen<sup>c</sup>, Jinhua Dong<sup>d</sup>, Zhiqin Gao<sup>a</sup>, Honglin Liu<sup>b</sup>

<sup>a</sup> Key Laboratory for Biological Medicine in Shandong Universities, Weifang Key Laboratory for Antibodies Medicine, School of Life Science and Technology, Weifang Medical University, Weifang 261053, China. *E-mail:* [xw17@mail.ustc.edu.cn](mailto:xw17@mail.ustc.edu.cn), [zhiqingao2013@163.com](mailto:zhiqingao2013@163.com)

<sup>b</sup> College of Food Science and Engineering, Hefei University of Technology, Hefei 230009, China. *E-mail:* [liuhonglin@mail.ustc.edu.cn](mailto:liuhonglin@mail.ustc.edu.cn)

<sup>c</sup> The First Affiliated Hospital of University of Science and Technology of China, Hefei 230027, China

<sup>d</sup> School of Rehabilitation Science and Engineering, University of health and Rehabilitation Sciences, Qingdao 266071, China

## S1 Experimental section

**Table S1.** The oligonucleotide sequences used in this experiment.

| Name            | Sequences (5'-3')                                |
|-----------------|--------------------------------------------------|
| CP-21           | NH2-TTTTTTCAACATCAGTCTGATAAGCTATTTTTT-SH         |
| CP-155          | NH2-TTTTTTCCCCTATCACGATTAGCATTATTTTTT-SH         |
| CP-let 7b       | NH2-TTTTTTAACCACACAACCTACTACCTCATTTTTTT-SH       |
| miR-21          | UAGCUUAUCAGACUGAUGUUGA                           |
| miR-155         | UUA AUGCUAAUCGUGAUAGGGG                          |
| let-7b          | UGAGGUAGUAGGUUGUGUGGUU                           |
| miR-141         | UAACACUGUCUGGUAAGAUGG                            |
| miR-21 forward  | ACACTCCAGCTGGGTAGCTTATCAGACTGA                   |
| miR-21 reverse  | CTCAACTGGTGTCGTGGAGTCGGCAATTCAGTTGAGTCAAC<br>ATC |
| miR-155 forward | TAATACCGTCTTAAAACCGT                             |
| miR-155 reverse | TTCTCGGGAACGTGAAACCT                             |
| Let 7b forward  | ACACTCCAGCTGGGTGAGGTAGTAGGTTGT                   |
| Let 7b reverse  | CTCAACTGGTGTCGTGGAGTCGGCAATTCAGTTGAGAACCA<br>CAC |
| U6 forward      | CTCGCTTCGGCAGCACA                                |
| U6 reverse      | AACGCTTCACGAATTTGCGT                             |

**Table S2.** SERS analysis for miR-21, miR-155 and let 7b in spiked healthy human serum sample (n=3).

| Sample  | Added (pM) | Detected (pM) | Recovery (%) | RSD (%) |
|---------|------------|---------------|--------------|---------|
| miR-21  | 10         | 9.71          | 97.1         | 3.17    |
| miR-155 | 10         | 10.35         | 103.5        | 3.53    |
| Let 7b  | 10         | 10.64         | 106.4        | 5.45    |

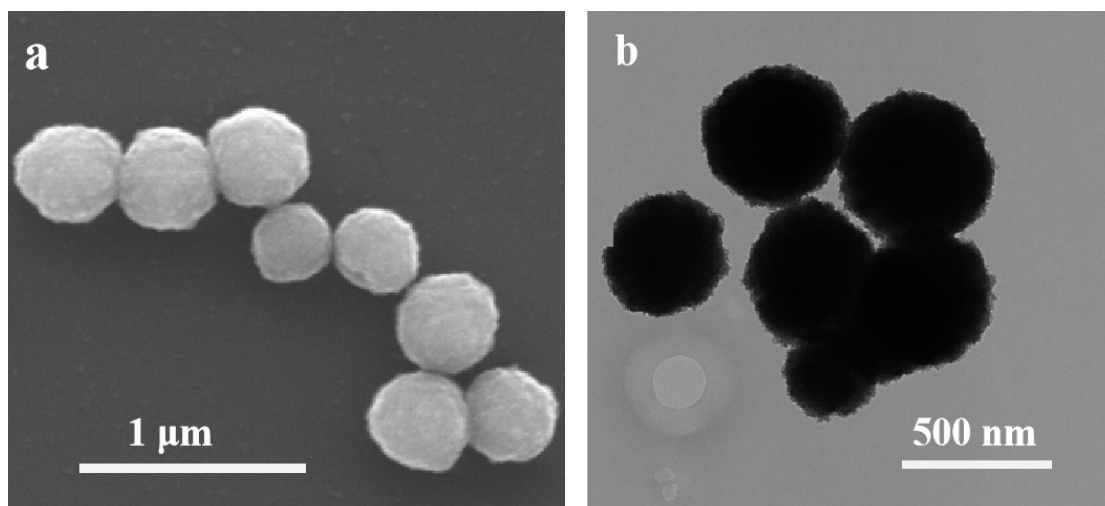

**Fig. S1.** SEM images of (a) Fe<sub>3</sub>O<sub>4</sub> NPs and TEM images of (b) Fe<sub>3</sub>O<sub>4</sub> NPs.

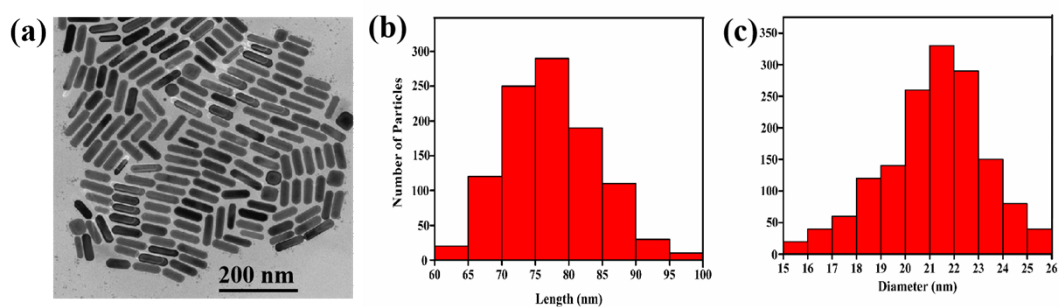

**Fig. S2.** (a) TEM images of the Au NPs. The length (b) and width (c) of gold nanorods (Au NRs).

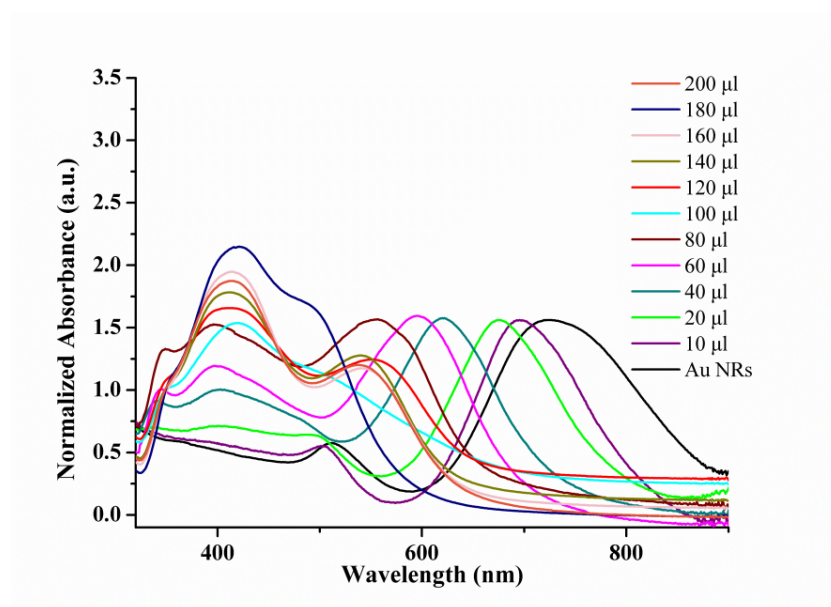

**Fig. S3.** The UV-vis spectra of Au@Ag NRs with increasing Ag-shells (AgNO<sub>3</sub> volume from 0 μL to 200 μL).

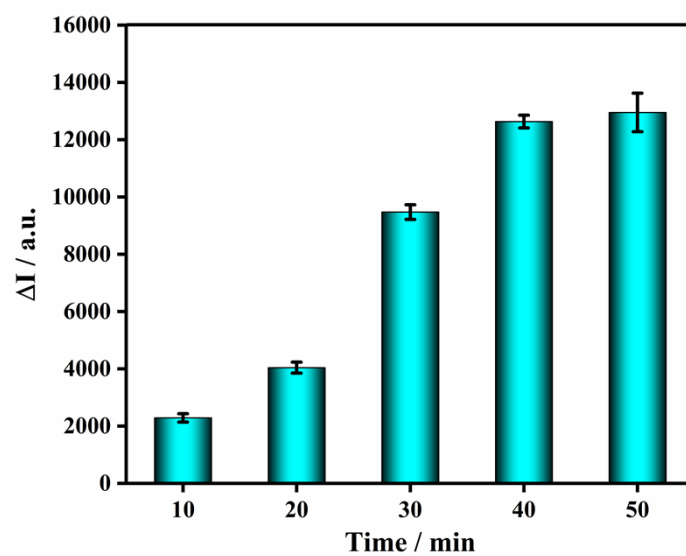

**Fig. S4.** Raman signal response of the SERS sensor plus miRNA-21 for different reaction time (0, 10, 20, 30, 40, and 50 min). Error bars were calculated based on the standard deviation of three measurements.

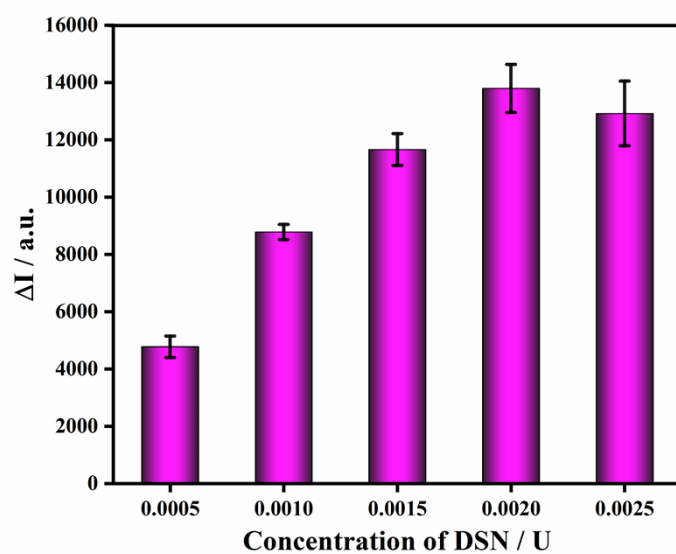

**Fig. S5.** Plots of the Raman intensity of the peak at  $1332 \text{ cm}^{-1}$  with various concentrations of DSN (0, 0.005, 0.01, 0.015, 0.02, and 0.025 U). Error bars were calculated based on the standard deviation of three measurements.

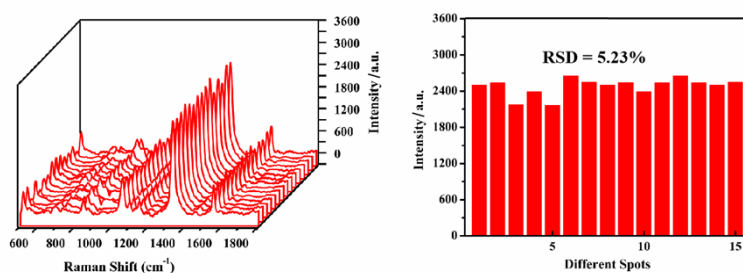

**Fig. S6.** (A) SERS spectra of the sandwich SERS sensor in the detection of 10 pM miRNA and (B) corresponding histogram collected from 15 different spots.
