# Supplementary figures and images for: Quantitative SERS detection of multiple breast cancer miRNAs based on duplex specific nuclease-mediated signal amplification
Source: Royal Society of Chemistry journal article supplement (doi:10.1039/d3ay00583f), 2023-01-01

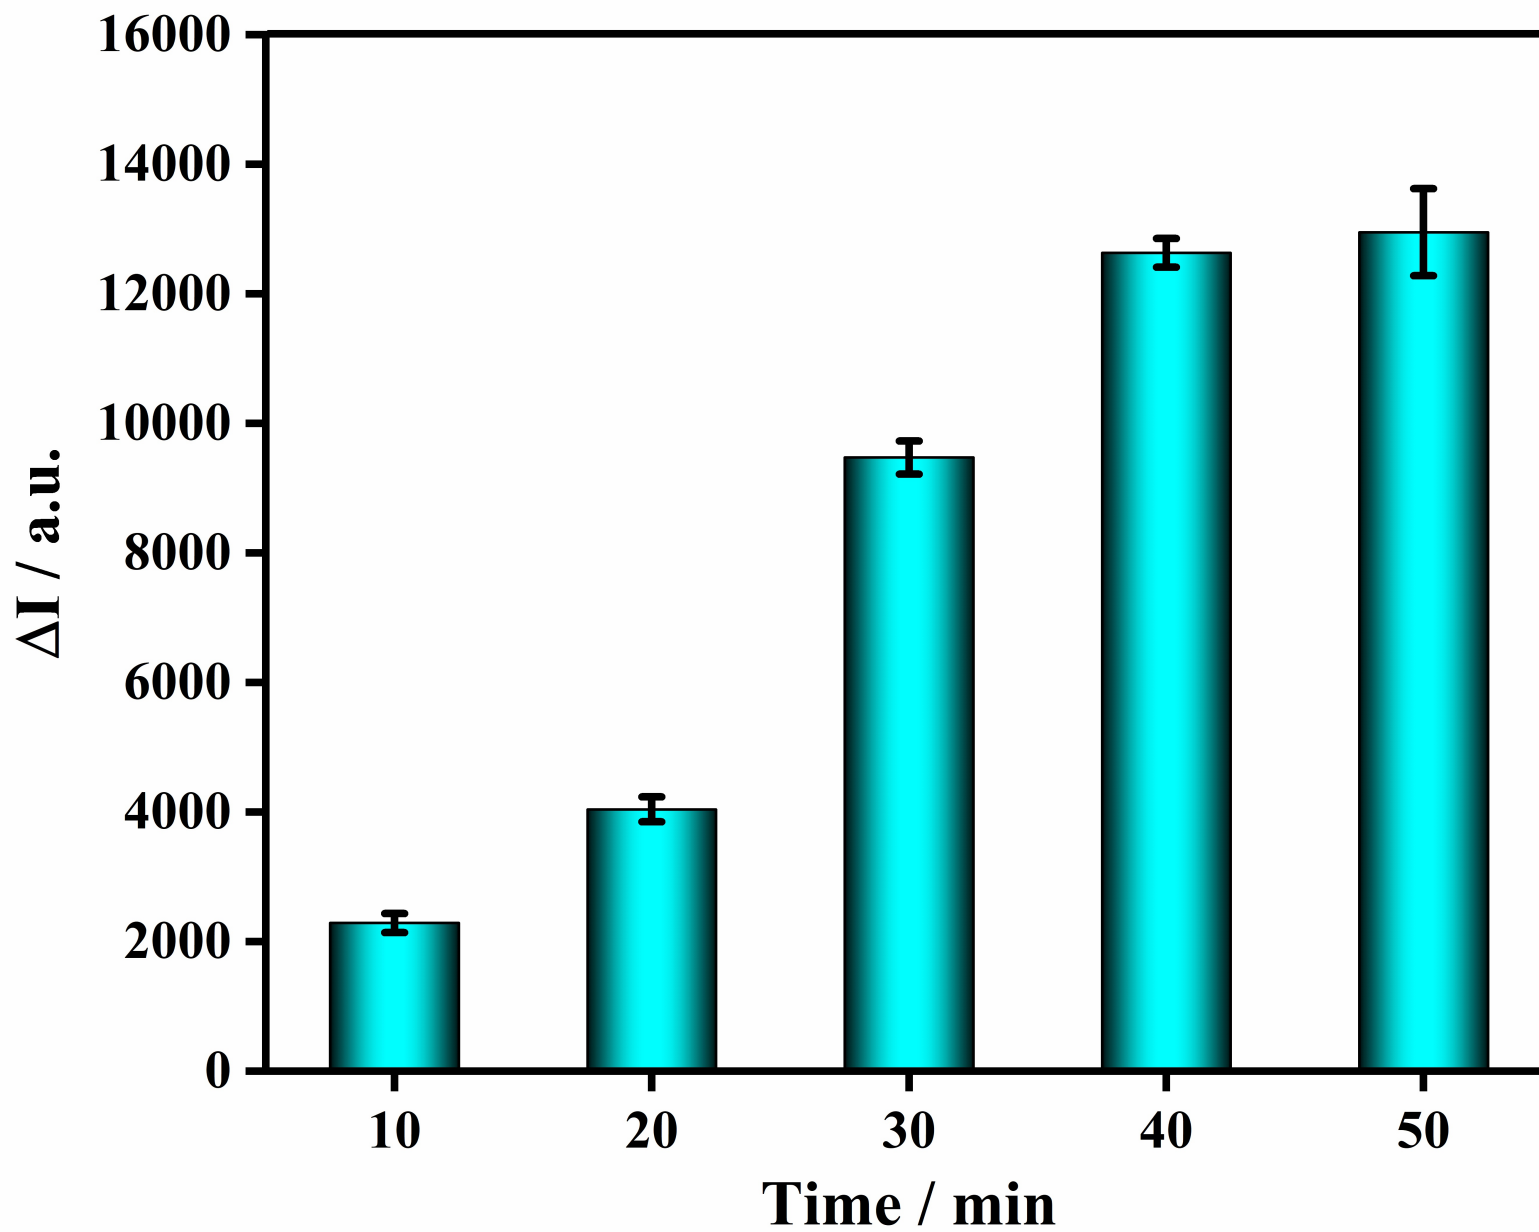

Supplement: d3ay00583f2.pdf [file d3ay00583f2.pdf]

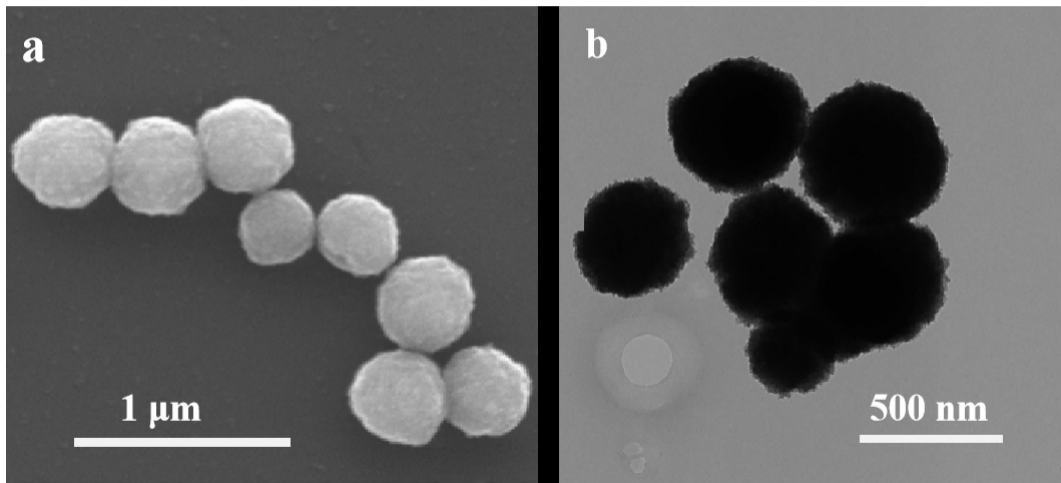

Supplement: d3ay00583f3.pdf [file d3ay00583f3.pdf]

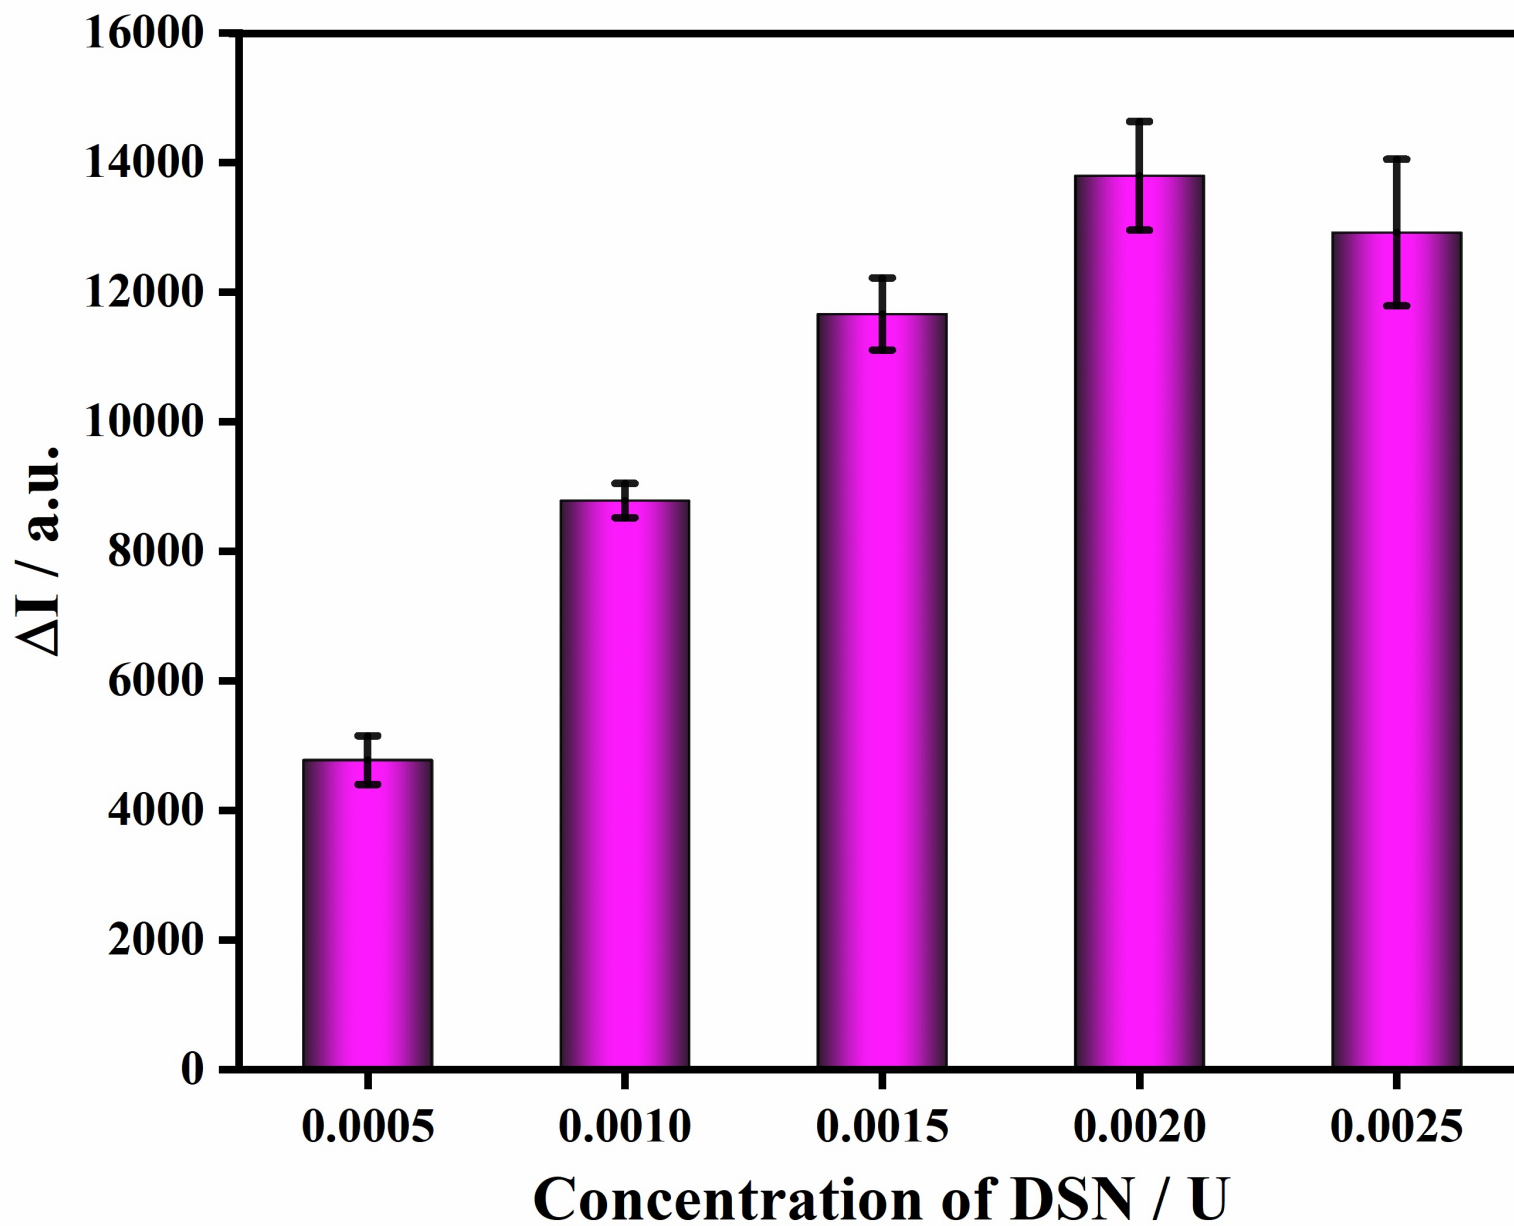

Supplement: d3ay00583f5.pdf [file d3ay00583f5.pdf]

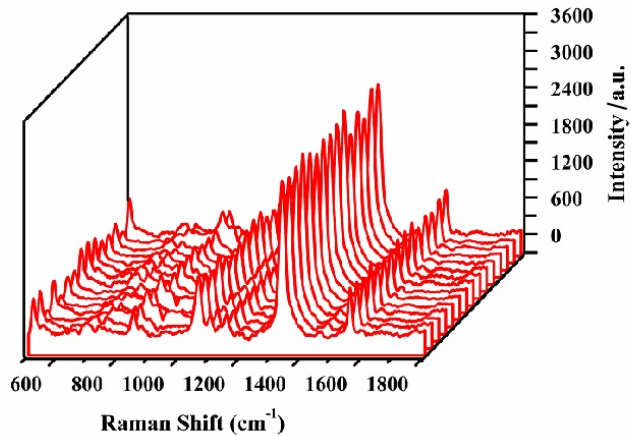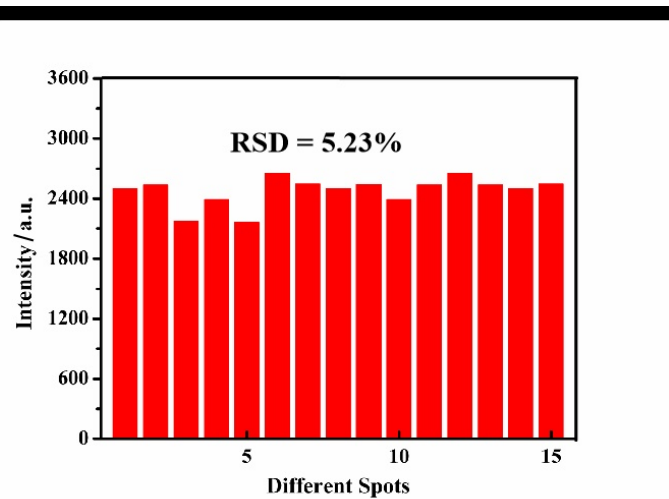

Supplement: d3ay00583f6.pdf [file d3ay00583f6.pdf]

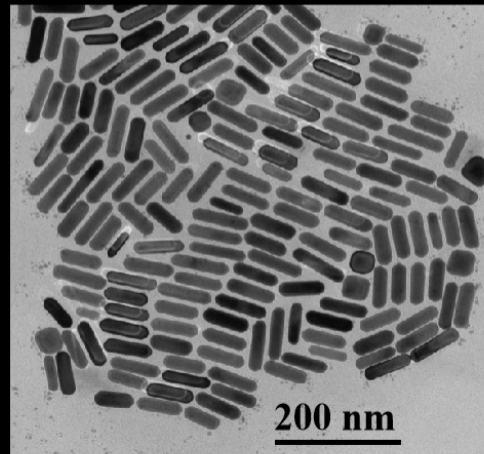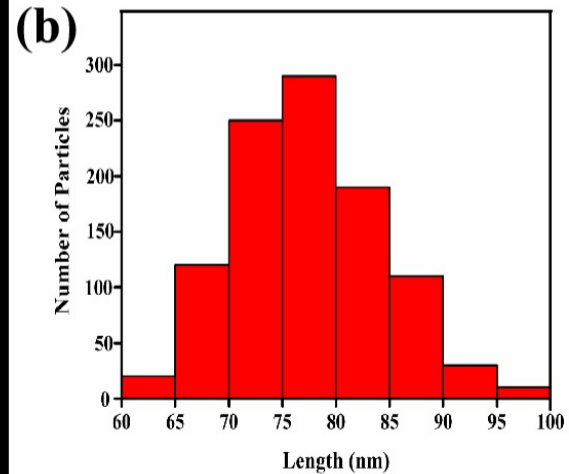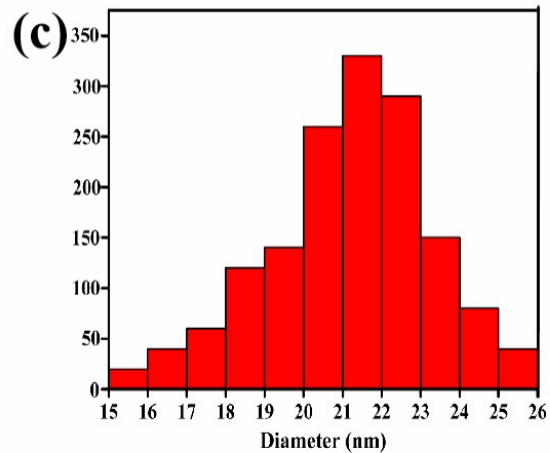

Supplement: d3ay00583f7.pdf [file d3ay00583f7.pdf]
